# Supplementary material for: Proteomic and metabolomic profiling combined with in vitro studies reveal the antiproliferative mechanism of silver nanoparticles in MDA-MB-231 breast carcinoma cells
Source: Royal Society of Chemistry journal article supplement (doi:10.1039/d1tb02760c), 2022-01-01
Supplement: d1tb02760c1.pdf [file d1tb02760c1.pdf]

## Proteomic and metabolomic profiling combined with in vitro studies reveal antiproliferative mechanism of silver nanoparticles in MDA-MB-231 breast carcinoma cells

J. Grace Nirmala, Kimaya Meher and Manu Lopus\*

School of Biological Sciences, UM-DAE Centre for Excellence in Basic Sciences, Mumbai-400098, India

Email: [manu.lopus@cbs.ac.in](mailto:manu.lopus@cbs.ac.in)

**Table S1:** Differentially expressed proteins in the T-AgNPs-treated cells

| Uniprot ID | Protein Name                                        | Peptide spectrum matches | Protein sequence coverage (%) | Protein Score | MW (kDa) | PI    |
|------------|-----------------------------------------------------|--------------------------|-------------------------------|---------------|----------|-------|
| P61604     | 10 kDa heat shock protein                           | 7                        | 45                            | 131           | 10.9     | 8.92  |
| P62820     | Ras-related protein Rab-1A                          | 19                       | 45                            | 257           | 22.7     | 6.21  |
| E5RK69     | Annexin                                             | 42                       | 43                            | 687           | 51.7     | 6.05  |
| O14737     | Programmed cell death protein 5                     | 5                        | 38                            | 31            | 14.3     | 6.04  |
| P35232     | Prohibitin                                          | 13                       | 36                            | 270           | 29.8     | 5.76  |
| Q15836     | Vesicle-associated membrane protein 3               | 3                        | 33                            | 99            | 11.3     | 8.79  |
| U3KQK0     | Histone H2B                                         | 17                       | 31                            | 366           | 18.8     | 10.54 |
| P51148     | Ras-related protein Rab-5C                          | 9                        | 29                            | 215           | 23.5     | 8.41  |
| P42677     | 40S ribosomal protein S27                           | 4                        | 29                            | 61            | 9.5      | 9.45  |
| Q9Y281     | Cofilin-2                                           | 9                        | 28                            | 222           | 18.7     | 7.88  |
| P34897     | Serine hydroxymethyltransferase                     | 18                       | 26                            | 355           | 56       | 8.53  |
| O95865     | N(G),N(G)-dimethylarginine dimethylaminohydrolase 2 | 4                        | 25                            | 53            | 29.6     | 6.01  |
| P25398     | 40S ribosomal protein S12                           | 7                        | 23                            | 133           | 14.5     | 7.21  |

|            |                                                       |    |    |     |      |       |
|------------|-------------------------------------------------------|----|----|-----|------|-------|
| P26583     | High mobility group protein B2                        | 7  | 22 | 118 | 24   | 7.81  |
| Q14320     | Protein FAM50A                                        | 8  | 22 | 84  | 40.2 | 6.83  |
| Q07021     | Complement component 1 Q subcomponent-binding protein | 9  | 22 | 167 | 31.3 | 4.84  |
| P05141     | ADP/ATP translocase 2                                 | 12 | 21 | 137 | 32.8 | 9.69  |
| P39019     | 40S ribosomal protein S19                             | 5  | 21 | 61  | 16.1 | 10.32 |
| Q99714     | 3-hydroxyacyl-CoA dehydrogenase type-2                | 5  | 20 | 73  | 26.9 | 7.78  |
| P51149     | Ras-related protein Rab-7a                            | 6  | 20 | 143 | 23.5 | 6.7   |
| P62244     | 40S ribosomal protein S15a                            | 7  | 19 | 120 | 14.8 | 10.13 |
| P00367     | Glutamate dehydrogenase 1                             | 15 | 19 | 235 | 61.4 | 7.8   |
| A8K878     | Mesencephalic astrocyte-derived neurotrophic factor   | 6  | 19 | 105 | 21.1 | 8.92  |
| Q03135     | Caveolin-1                                            | 5  | 18 | 88  | 20.5 | 6.02  |
| P49411     | Elongation factor Tu                                  | 11 | 18 | 183 | 49.5 | 7.61  |
| P14174     | Macrophage migration inhibitory factor                | 2  | 17 | 36  | 12.5 | 7.88  |
| P62851     | 40S ribosomal protein S25                             | 4  | 16 | 63  | 13.7 | 10.11 |
| A0A2R8YD14 | 40S ribosomal protein S24                             | 3  | 16 | 40  | 19.2 | 10.98 |
| P62266     | 40S ribosomal protein S23                             | 3  | 15 | 56  | 15.8 | 10.49 |
| P27824     | Calnexin                                              | 12 | 15 | 152 | 67.5 | 4.6   |
| P21796     | Voltage-dependent anion-selective channel protein 1   | 5  | 15 | 76  | 30.8 | 8.54  |
| Q99623     | Prohibitin-2                                          | 5  | 15 | 116 | 33.3 | 9.83  |
| H0YKD8     | 60S ribosomal protein L28                             | 2  | 15 | 41  | 19.1 | 11.46 |
| P53004     | Biliverdin reductase A                                | 7  | 15 | 81  | 33.4 | 6.44  |
| O75367     | Core histone macro-H2A.1                              | 4  | 14 | 51  | 39.6 | 9.79  |
| P45880     | Voltage-dependent anion-selective channel protein 2   | 4  | 14 | 39  | 31.5 | 7.56  |
| B0QYN7     | SUMO-conjugating enzyme UBC9                          | 3  | 14 | 36  | 20.4 | 8.46  |
| F8W930     | Insulin-like growth factor 2 mRNA-binding             | 11 | 14 | 194 | 66.7 | 8.46  |

|        | protein 2                                        |    |    |     |      |       |
|--------|--------------------------------------------------|----|----|-----|------|-------|
| O00762 | Ubiquitin-conjugating enzyme E2 C                | 3  | 13 | 33  | 19.6 | 7.37  |
| P22087 | rRNA 2'-O-methyltransferase fibrillar            | 4  | 13 | 42  | 33.8 | 10.18 |
| P62269 | 40S ribosomal protein S18                        | 3  | 13 | 38  | 17.7 | 10.99 |
| B7Z4C8 | 60S ribosomal protein L31                        | 3  | 13 | 48  | 15.1 | 10.37 |
| H0YFD6 | Trifunctional enzyme subunit alpha               | 11 | 13 | 128 | 86.3 | 9.1   |
| P36551 | Oxygen-dependent coproporphyrinogen-III oxidase  | 7  | 13 | 152 | 50.1 | 8.25  |
| P04181 | Ornithine aminotransferase                       | 7  | 13 | 167 | 48.5 | 7.03  |
| P13726 | Tissue factor                                    | 3  | 13 | 47  | 33   | 7.03  |
| P31350 | Ribonucleoside-diphosphate reductase subunit M2  | 4  | 13 | 94  | 44.8 | 5.38  |
| P11766 | Alcohol dehydrogenase class-3                    | 5  | 13 | 66  | 39.7 | 7.49  |
| Q9UJZ1 | Stomatin-like protein 2                          | 4  | 12 | 107 | 38.5 | 7.39  |
| P00374 | Dihydrofolate reductase                          | 2  | 12 | 44  | 21.4 | 7.42  |
| Q96I99 | Succinate--CoA ligase [GDP-forming] subunit beta | 6  | 12 | 89  | 46.5 | 6.39  |
| P09110 | 3-ketoacyl-CoA thiolase                          | 5  | 12 | 61  | 44.3 | 8.44  |
| C9J5N1 | PTGES3L-AARSD1 readthrough                       | 6  | 12 | 85  | 55   | 6.55  |
| Q9P287 | BRCA2 and CDKN1A-interacting protein             | 6  | 11 | 67  | 36   | 4.61  |
| Q8N1G4 | Leucine-rich repeat-containing protein 47        | 8  | 11 | 189 | 63.4 | 8.28  |
| P49755 | Transmembrane emp24 domain-containing protein 10 | 5  | 11 | 79  | 25   | 7.44  |
| P30084 | Enoyl-CoA hydratase                              | 5  | 10 | 94  | 31.4 | 8.07  |
| P21589 | 5'-nucleotidase                                  | 6  | 10 | 104 | 63.3 | 7.03  |
| D6RBW1 | Eukaryotic translation initiation factor 4E      | 6  | 10 | 90  | 28.5 | 8.12  |
| F8WAR4 | MICOS complex subunit                            | 3  | 10 | 63  | 27.7 | 6.64  |
| P61019 | Ras-related protein Rab-2A                       | 3  | 10 | 54  | 23.5 | 6.54  |
| P49748 | Very long-chain specific acyl-CoA                | 9  | 9  | 182 | 70.3 | 8.75  |

|            | dehydrogenase                                                    |   |   |     |       |      |
|------------|------------------------------------------------------------------|---|---|-----|-------|------|
| P05412     | Transcription factor AP-1                                        | 3 | 9 | 42  | 35.7  | 8.76 |
| Q96C36     | Pyrroline-5-carboxylate reductase 2                              | 2 | 8 | 31  | 33.6  | 7.77 |
| Q8IVD9     | NudC domain-containing protein 3                                 | 3 | 8 | 111 | 40.8  | 5.25 |
| E9PF18     | Hydroxyacyl-coenzyme A dehydrogenase                             | 4 | 8 | 52  | 42.1  | 9.26 |
| Q14558     | Phosphoribosyl pyrophosphate synthase-associated protein 1       | 2 | 8 | 55  | 39.4  | 7.2  |
| Q92615     | La-related protein 4B                                            | 7 | 8 | 162 | 80.5  | 6.92 |
| Q9H9A6     | Leucine-rich repeat-containing protein 40                        | 6 | 8 | 102 | 68.2  | 6.43 |
| P02786     | Transferrin receptor protein 1                                   | 7 | 8 | 127 | 84.8  | 6.61 |
| P48147     | Prolyl endopeptidase                                             | 4 | 7 | 108 | 80.6  | 5.86 |
| O75792     | Ribonuclease H2 subunit A                                        | 3 | 7 | 60  | 33.4  | 5.25 |
| P05556     | Integrin beta-1                                                  | 7 | 7 | 80  | 88.4  | 5.39 |
| Q13642     | Four and a half LIM domains protein 1                            | 3 | 7 | 67  | 36.2  | 8.97 |
| Q16643     | Drebrin                                                          | 4 | 7 | 29  | 71.4  | 4.45 |
| Q7L5N1     | COP9 signalosome complex subunit 6                               | 2 | 7 | 35  | 36.1  | 5.73 |
| Q9UBS4     | DnaJ homolog subfamily B member 11                               | 3 | 7 | 65  | 40.5  | 6.18 |
| P07686     | Beta-hexosaminidase subunit beta                                 | 5 | 7 | 70  | 63.1  | 6.76 |
| P52306     | Rap1 GTPase-GDP dissociation stimulator 1                        | 6 | 6 | 91  | 66.3  | 5.31 |
| Q86U42     | Polyadenylate-binding protein 2                                  | 4 | 6 | 67  | 32.7  | 5.06 |
| Q01970     | 1-phosphatidylinositol 4,5-bisphosphate phosphodiesterase beta-3 | 6 | 6 | 113 | 138.7 | 5.9  |
| P11498     | Pyruvate carboxylase                                             | 6 | 6 | 70  | 129.6 | 6.84 |
| P13674     | Prolyl 4-hydroxylase subunit alpha-1                             | 4 | 6 | 76  | 61    | 6.01 |
| O43493     | Trans-Golgi network integral membrane protein 2                  | 4 | 6 | 60  | 51    | 5.73 |
| A0A0G2JLB3 | Glucosylceramidase                                               | 6 | 6 | 83  | 59.6  | 7.42 |
| Q9Y5U2     | Protein TSSC4                                                    | 3 | 6 | 47  | 34.3  | 5.19 |
| Q8N335     | Glycerol-3-phosphate dehydrogenase 1-like protein                | 2 | 6 | 24  | 38.4  | 7.02 |

|            |                                                                                           |   |   |     |       |      |
|------------|-------------------------------------------------------------------------------------------|---|---|-----|-------|------|
| O43815     | Striatin                                                                                  | 5 | 6 | 109 | 86.1  | 5.27 |
| Q70UQ0     | Inhibitor of nuclear factor kappa-B kinase-interacting protein                            | 4 | 5 | 70  | 39.3  | 9.17 |
| Q8TDN6     | Ribosome biogenesis protein BRX1 homolog                                                  | 2 | 5 | 41  | 41.4  | 9.92 |
| Q14683     | Structural maintenance of chromosomes protein 1A                                          | 9 | 5 | 102 | 143.1 | 7.64 |
| P53990     | IST1 homolog                                                                              | 2 | 5 | 32  | 39.7  | 5.35 |
| O75410     | Transforming acidic coiled-coil-containing protein 1                                      | 4 | 5 | 108 | 87.7  | 4.88 |
| Q96T60     | Bifunctional polynucleotide phosphatase/kinase                                            | 6 | 5 | 110 | 57    | 8.46 |
| A0A499FI31 | Squamous cell carcinoma antigen recognized by T-cells 3                                   | 6 | 5 | 95  | 111.9 | 5.5  |
| P55084     | Trifunctional enzyme subunit beta                                                         | 3 | 5 | 27  | 51.3  | 9.41 |
| P48960     | CD97 antigen                                                                              | 8 | 5 | 200 | 91.8  | 6.87 |
| A0A2R8Y5Y7 | 60S ribosomal protein L9                                                                  | 3 | 5 | 53  | 25    | 9.74 |
| Q9NVX2     | Notchless protein homolog 1                                                               | 2 | 5 | 32  | 53.3  | 7.34 |
| P51003     | Poly(A) polymerase alpha                                                                  | 3 | 5 | 27  | 82.8  | 7.37 |
| A2A274     | Aconitate hydratase                                                                       | 4 | 4 | 62  | 87.8  | 7.37 |
| V9GYM8     | Rho guanine nucleotide exchange factor 2                                                  | 6 | 4 | 105 | 116   | 7.37 |
| Q9NY93     | Probable ATP-dependent RNA helicase DDX56                                                 | 3 | 4 | 75  | 61.6  | 9.26 |
| Q96JB5     | CDK5 regulatory subunit-associated protein 3                                              | 3 | 4 | 58  | 56.9  | 4.75 |
| O94925     | Glutaminase kidney isoform                                                                | 3 | 4 | 37  | 73.4  | 7.77 |
| Q9BYT8     | Neurolysin                                                                                | 4 | 4 | 76  | 80.6  | 6.64 |
| Q96GA3     | Protein LTV1 homolog                                                                      | 3 | 4 | 52  | 54.8  | 4.91 |
| P10515     | Dihydrolipoyllysine-residue acetyltransferase component of pyruvate dehydrogenase complex | 3 | 4 | 112 | 69    | 7.84 |
| Q9UFC0     | Leucine-rich repeat and WD repeat-containing                                              | 2 | 4 | 55  | 70.8  | 7.21 |

|            | protein 1                                                                  |   |   |     |       |      |
|------------|----------------------------------------------------------------------------|---|---|-----|-------|------|
| Q9H4L5     | Oxysterol-binding protein-related protein 3                                | 3 | 3 | 73  | 101.2 | 6.87 |
| P54886     | Delta-1-pyrroline-5-carboxylate synthase                                   | 3 | 3 | 52  | 87.2  | 7.12 |
| O95202     | Mitochondrial proton/calcium exchanger protein                             | 4 | 3 | 71  | 83.3  | 6.7  |
| Q92542     | Nicastrin                                                                  | 3 | 3 | 33  | 78.4  | 5.99 |
| A0A1B0GTL5 | Rab11 family-interacting protein 5                                         | 4 | 3 | 45  | 138.3 | 5.21 |
| O60568     | Multifunctional procollagen lysine hydroxylase and glycosyltransferase LH3 | 3 | 3 | 63  | 84.7  | 6.05 |
| O00469     | Procollagen-lysine,2-oxoglutarate 5-dioxygenase 2                          | 3 | 3 | 73  | 84.6  | 6.71 |
| Q16891     | MICOS complex subunit MIC60                                                | 2 | 3 |     | 83.6  | 6.48 |
| Q96ST2     | Protein IWS1 homolog                                                       | 3 | 2 | 53  | 91.9  | 4.69 |
| O43747     | AP-1 complex subunit gamma-1                                               | 2 | 2 | 72  | 91.3  | 6.8  |
| Q9NYF8     | Bcl-2-associated transcription factor 1                                    | 3 | 2 | 44  | 106.1 | 9.98 |
| Q9Y6A5     | Transforming acidic coiled-coil-containing protein 3                       | 2 | 2 | 59  | 90.3  | 5.05 |
| P23229     | Integrin alpha-6                                                           | 2 | 2 | 65  | 126.5 | 6.61 |
| A0A087X117 | Nodal modulator 1                                                          | 5 | 2 | 92  | 139.4 | 5.85 |
| Q13751     | Laminin subunit beta-3                                                     | 5 | 2 | 111 | 129.5 | 7.21 |
| P42704     | Leucine-rich PPR motif-containing protein                                  | 3 | 2 | 74  | 157.8 | 6.13 |
| Q14980     | Nuclear mitotic apparatus protein 1                                        | 5 | 1 | 60  | 238.1 | 5.78 |
| P27708     | CAD protein                                                                | 2 | 1 | 48  | 242.8 | 6.46 |

**Table S2.** Down-regulated proteins involved in metabolic pathways

| <b>S.No</b> | <b>Uniprot ID</b> | <b>Protein Name</b>                                                                       |
|-------------|-------------------|-------------------------------------------------------------------------------------------|
| 1.          | Q99714            | 3-hydroxyacyl-CoA dehydrogenase type-2                                                    |
| 2.          | P54886            | Delta-1-pyrroline-5-carboxylate synthase                                                  |
| 3.          | P00367            | Glutamate dehydrogenase 1                                                                 |
| 4.          | P07686            | Beta-hexosaminidase subunit beta                                                          |
| 5.          | P11766            | Alcohol dehydrogenase class-3                                                             |
| 6.          | P30084            | Enoyl-CoA hydratase                                                                       |
| 7.          | P27708            | CAD protein                                                                               |
| 8.          | H0YFD6            | Trifunctional enzyme subunit alpha                                                        |
| 9.          | P55084            | Trifunctional enzyme subunit beta                                                         |
| 10.         | Q01970            | 1-phosphatidylinositol 4,5-bisphosphate phosphodiesterase beta-3                          |
| 11.         | P13674            | Prolyl 4-hydroxylase subunit alpha-1                                                      |
| 12.         | P36551            | Oxygen-dependent coproporphyrinogen-III oxidase                                           |
| 13.         | E9PF18            | Hydroxyacyl-coenzyme A dehydrogenase                                                      |
| 14.         | P21589            | 5'-nucleotidase                                                                           |
| 15.         | A0A0G2JLB3        | Glucosylceramidase                                                                        |
| 16.         | P34897            | Serine hydroxymethyltransferase                                                           |
| 17.         | A2A274            | Aconitate hydratase                                                                       |
| 18.         | Q96I99            | Succinate--CoA ligase [GDP-forming] subunit beta                                          |
| 19.         | P10515            | Dihydrolipoyllysine-residue acetyltransferase component of pyruvate dehydrogenase complex |
| 20.         | P49748            | Very long-chain specific acyl-CoA dehydrogenase                                           |
| 21.         | Q96C36            | Pyrroline-5-carboxylate reductase 2                                                       |
| 22.         | P00374            | Dihydrofolate reductase                                                                   |
| 23.         | P31350            | Ribonucleoside-diphosphate reductase subunit M2                                           |
| 24.         | O94925            | Glutaminase kidney isoform                                                                |
| 25.         | P04181            | Ornithine aminotransferase                                                                |
| 26.         | P09110            | 3-ketoacyl-CoA thiolase                                                                   |
| 27.         | P11498            | Pyruvate carboxylase                                                                      |

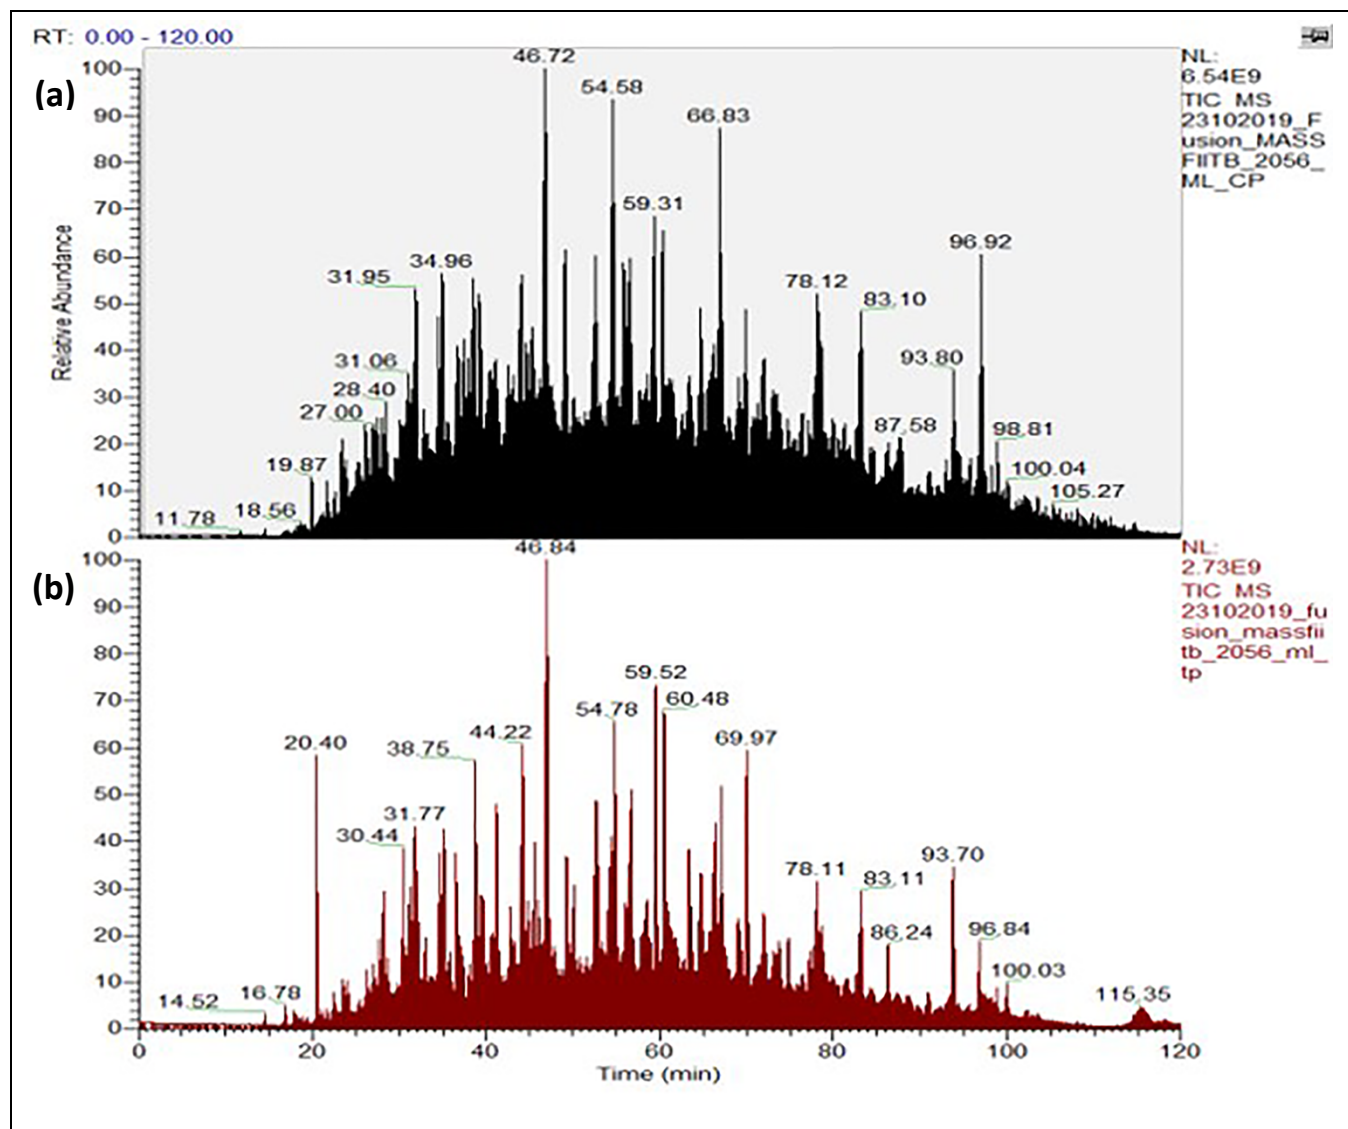

**Supplementary Figure 1.** Mass spectrometry-assisted proteomic analysis. (a) Total ion chromatogram plots for the (a) control and (b) T-AgNPs treated cells.



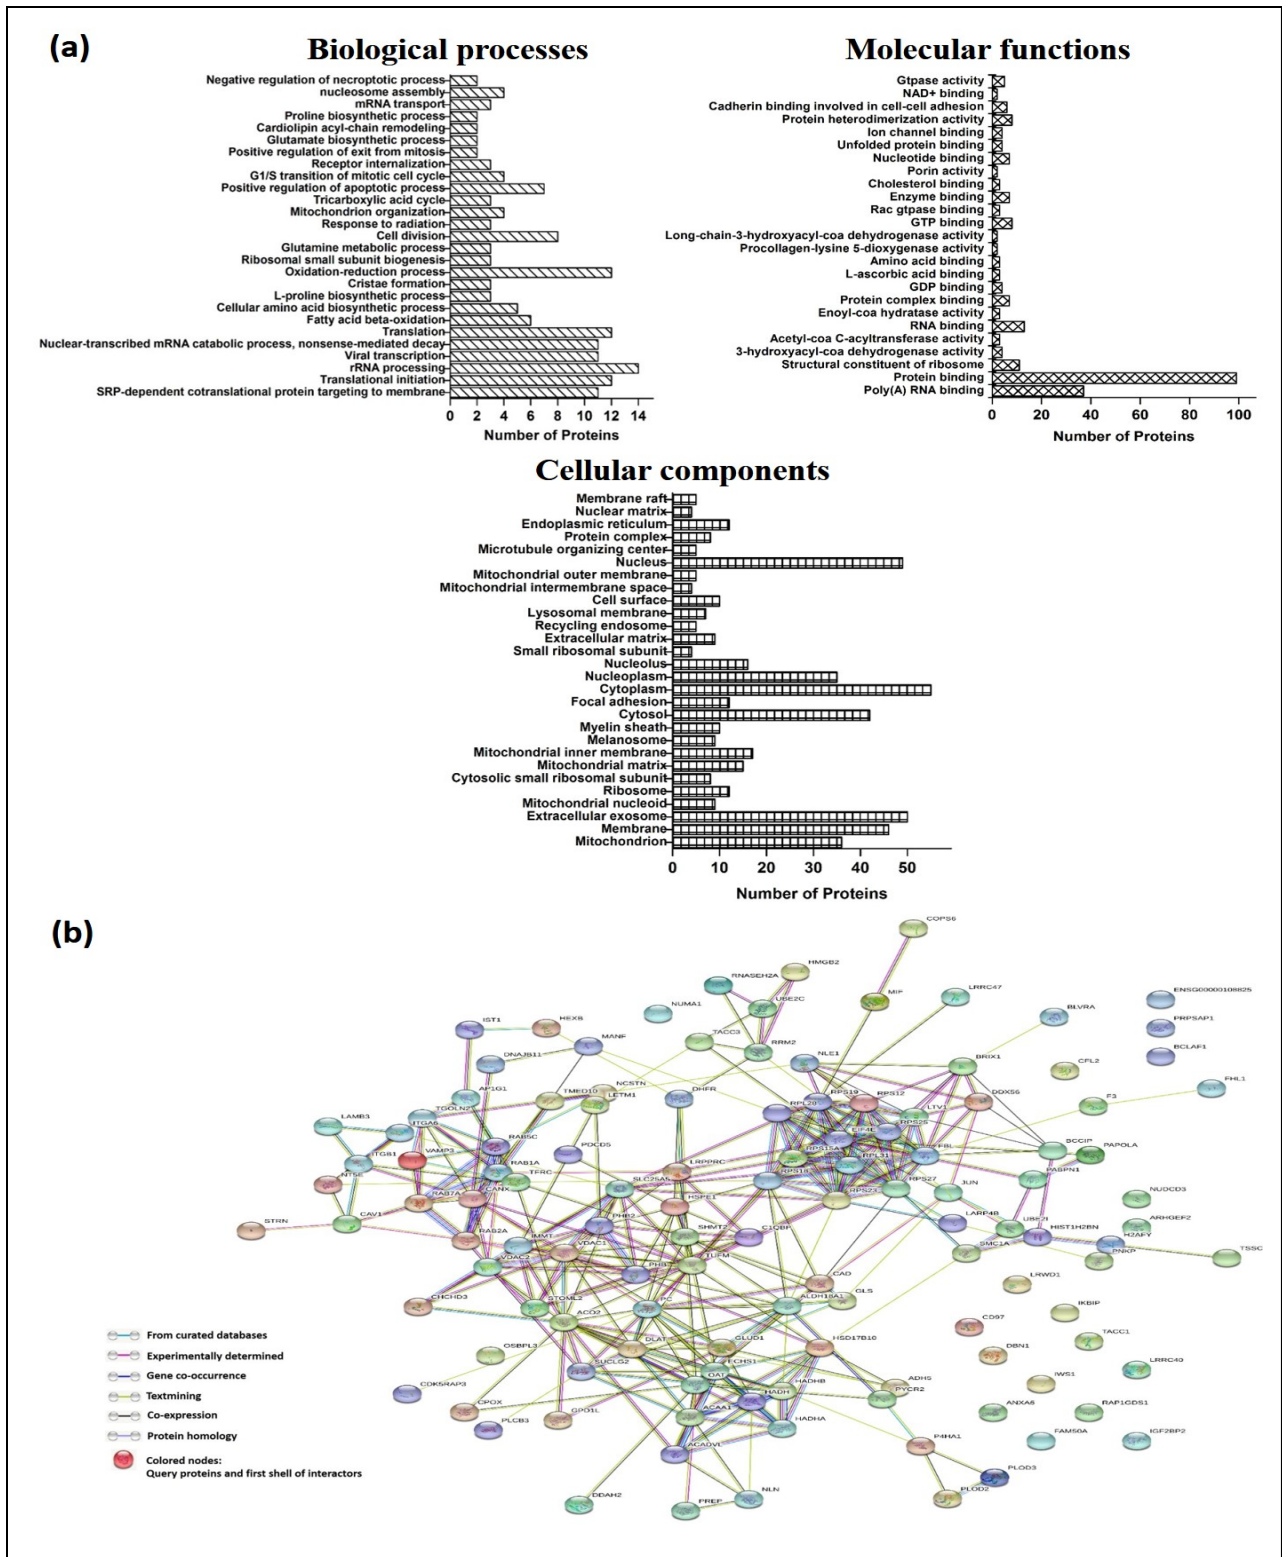

**Supplementary Figure 2.** (a) Differentially expressed proteins in treated cells grouped into GO terms. (b) The protein-protein interaction network of the 127 identified differentially expressed-proteins using STRING 11.5 database

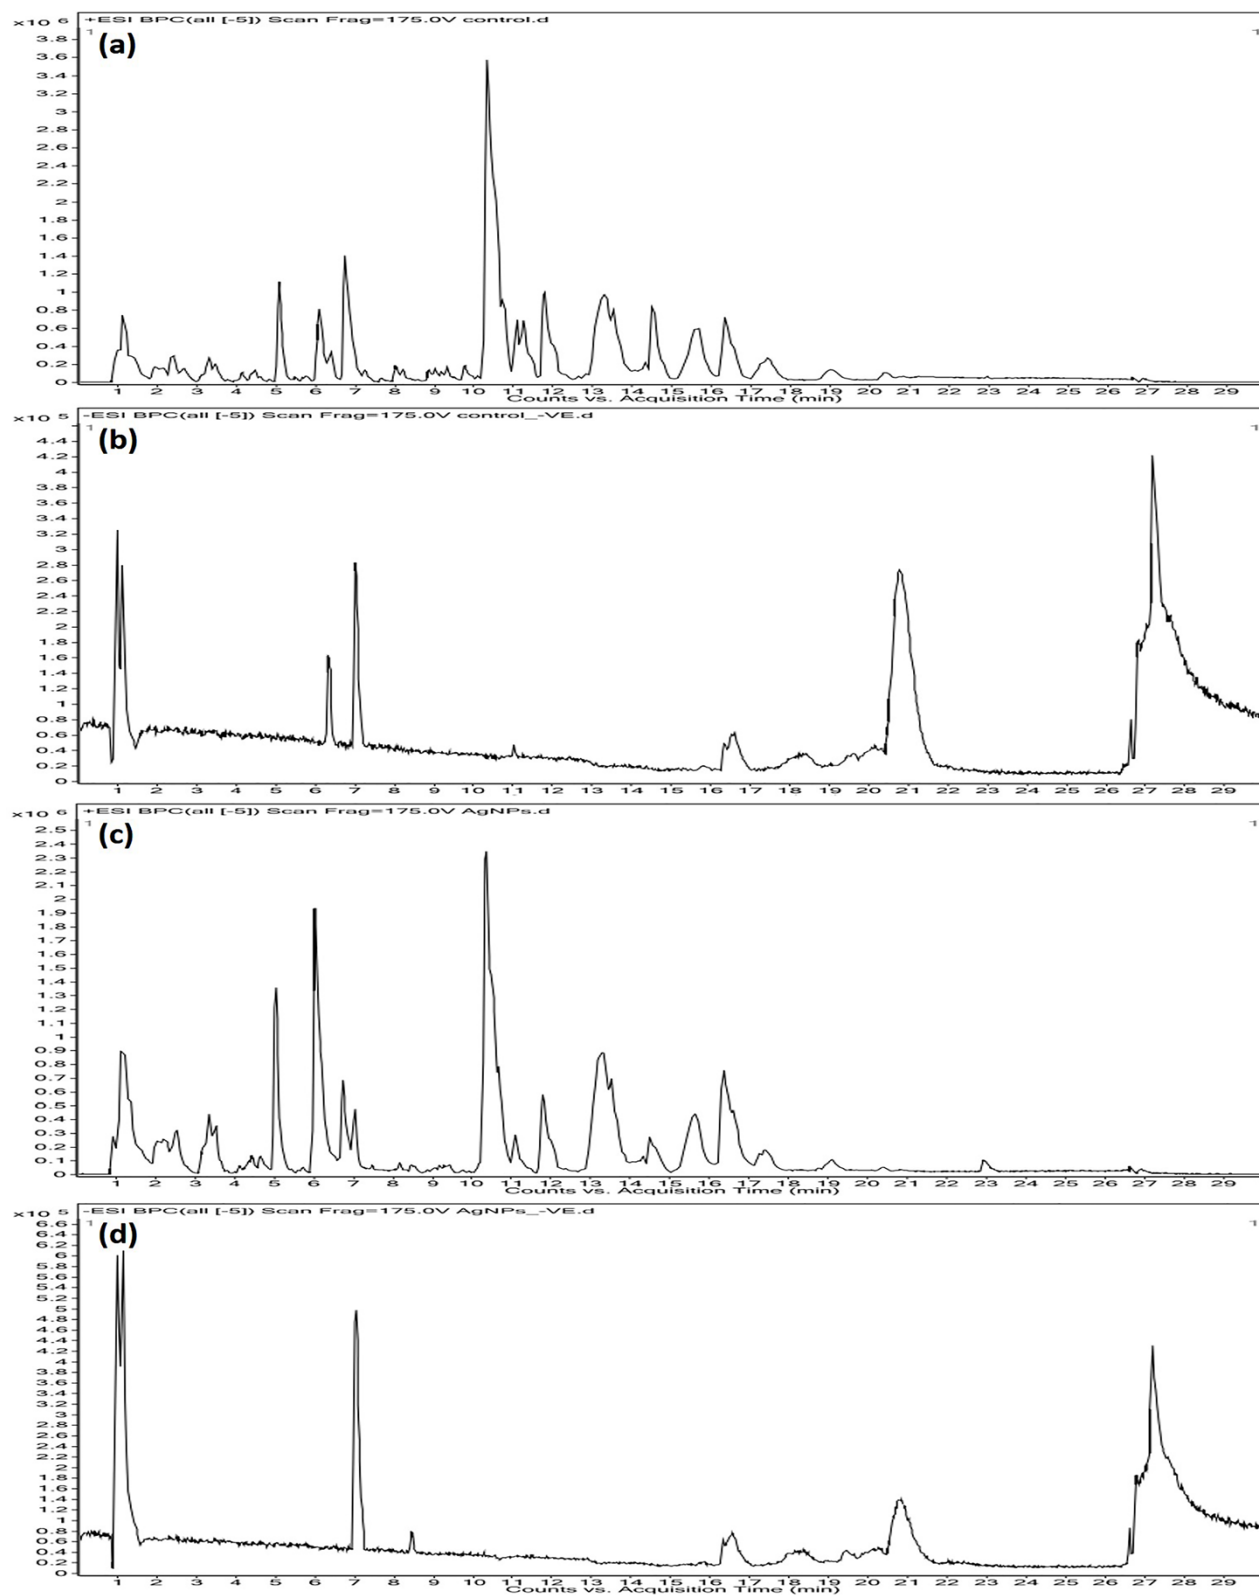

**Supplementary Figure 3.** Mass spectrometry-assisted metabolomic analysis. Base peak chromatograms (BPC) in ESI  $^{+/-}$  mode. BPC of control cells in (a) positive and (b) negative mode; BPC of treated cells in (c) positive and (d) negative mode.
